# Supplementary material for: Mixing behaviour of Pluronics with gemini surfactant/plasmid DNA condensates: effect of Pluronic composition
Source: Royal Society of Chemistry journal article supplement (doi:10.1039/d0cp00309c), 2020-01-01
Supplement: d0cp00309c1.pdf [file d0cp00309c1.pdf]

# Supplementary Information

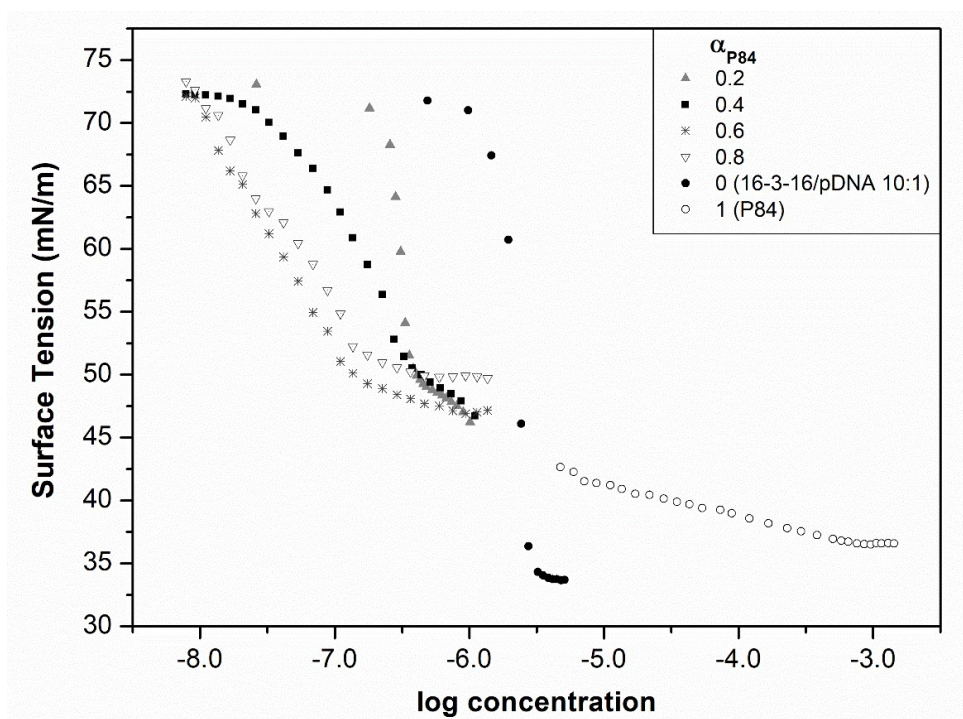

**Figure S1** Plots of surface tension versus total amphiphile for P84/16-3-16/pDNA mixtures with varying mole fractions of P84.  $\alpha = 1$ , and  $\alpha = 0$  represent pure P84 and 16-3-16/pDNA solutions, respectively.

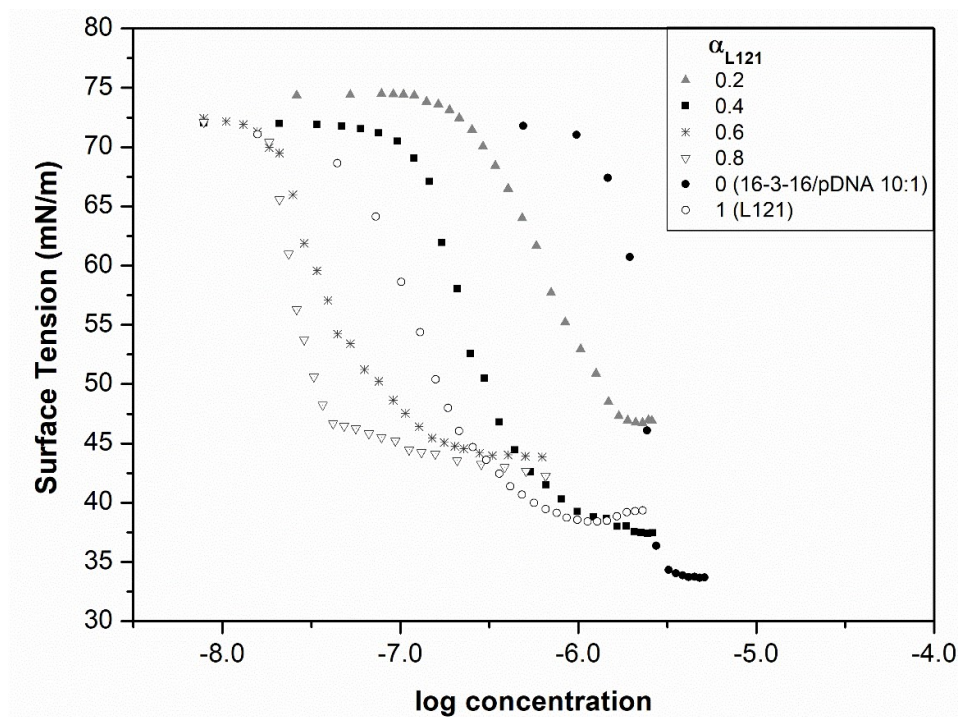

**Figure S2** Plots of surface tension versus total amphiphile for L121/16-3-16/pDNA mixtures with varying mole fractions of L121.  $\alpha = 1$ , and  $\alpha = 0$  represent pure L121 and 16-3-16/pDNA solutions, respectively.

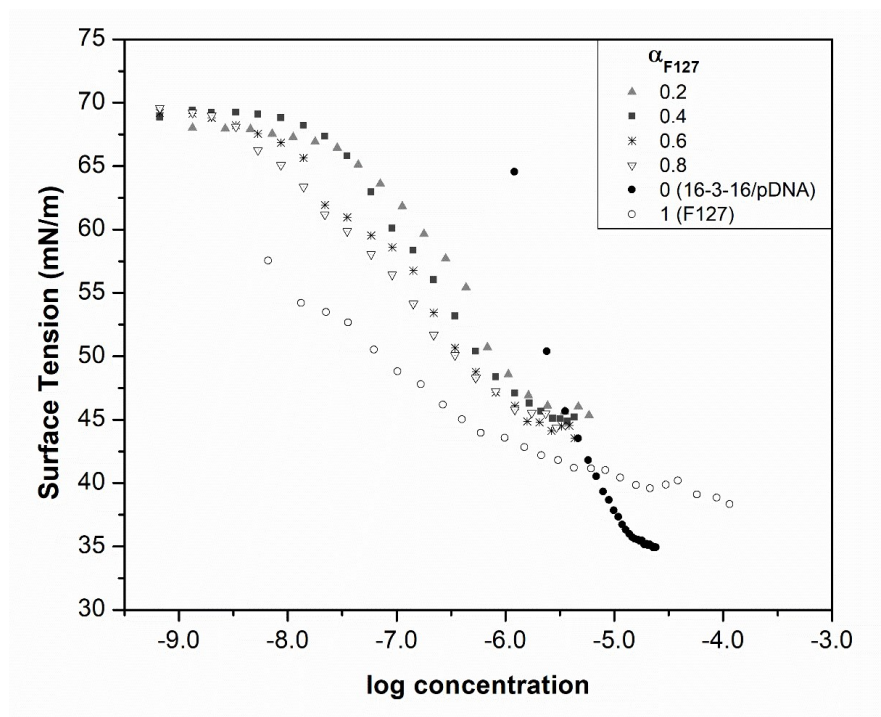

**Figure S3** Plots of surface tension versus total amphiphile for F127/16-3-16/pDNA mixtures with varying mole fractions of F127.  $\alpha = 1$ , and  $\alpha = 0$  represent pure F127 and 16-3-16/pDNA solutions, respectively.

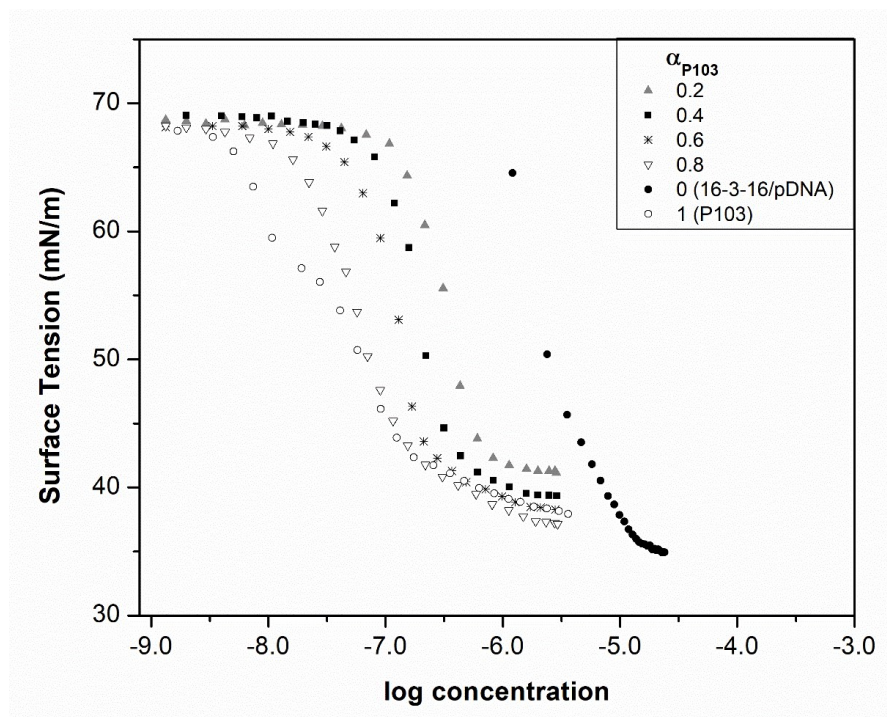

**Figure S4** Plots of surface tension versus total amphiphile for P103/16-3-16/pDNA mixtures with varying mole fractions of P103.  $\alpha = 1$ , and  $\alpha = 0$  represent pure P103 and 16-3-16/pDNA solutions, respectively.

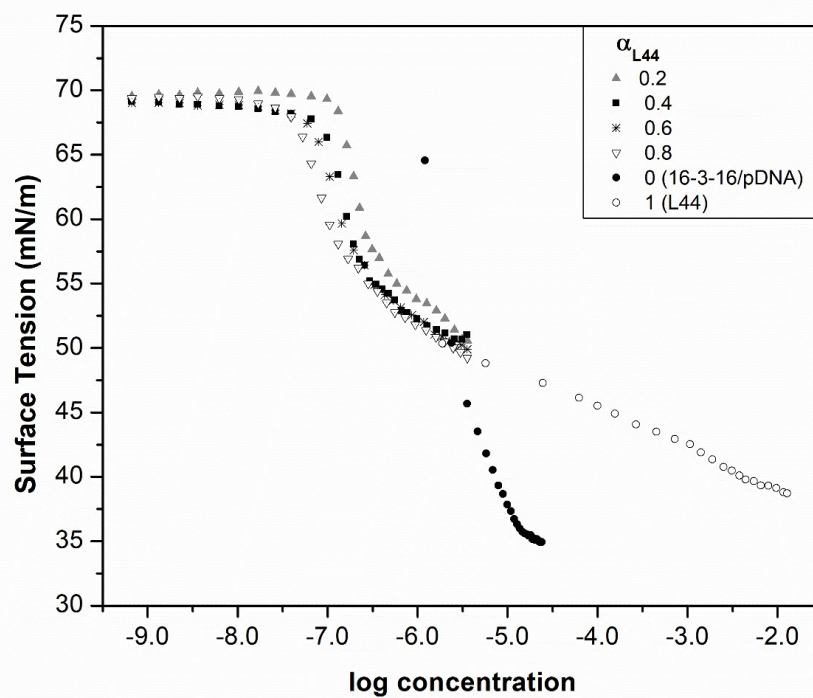

**Figure S5** Plots of surface tension versus total amphiphile for L44/16-3-16/pDNA mixtures with varying mole fractions of L44.  $\alpha = 1$ , and  $\alpha = 0$  represent pure L44 and 16-3-16/pDNA solutions, respectively.

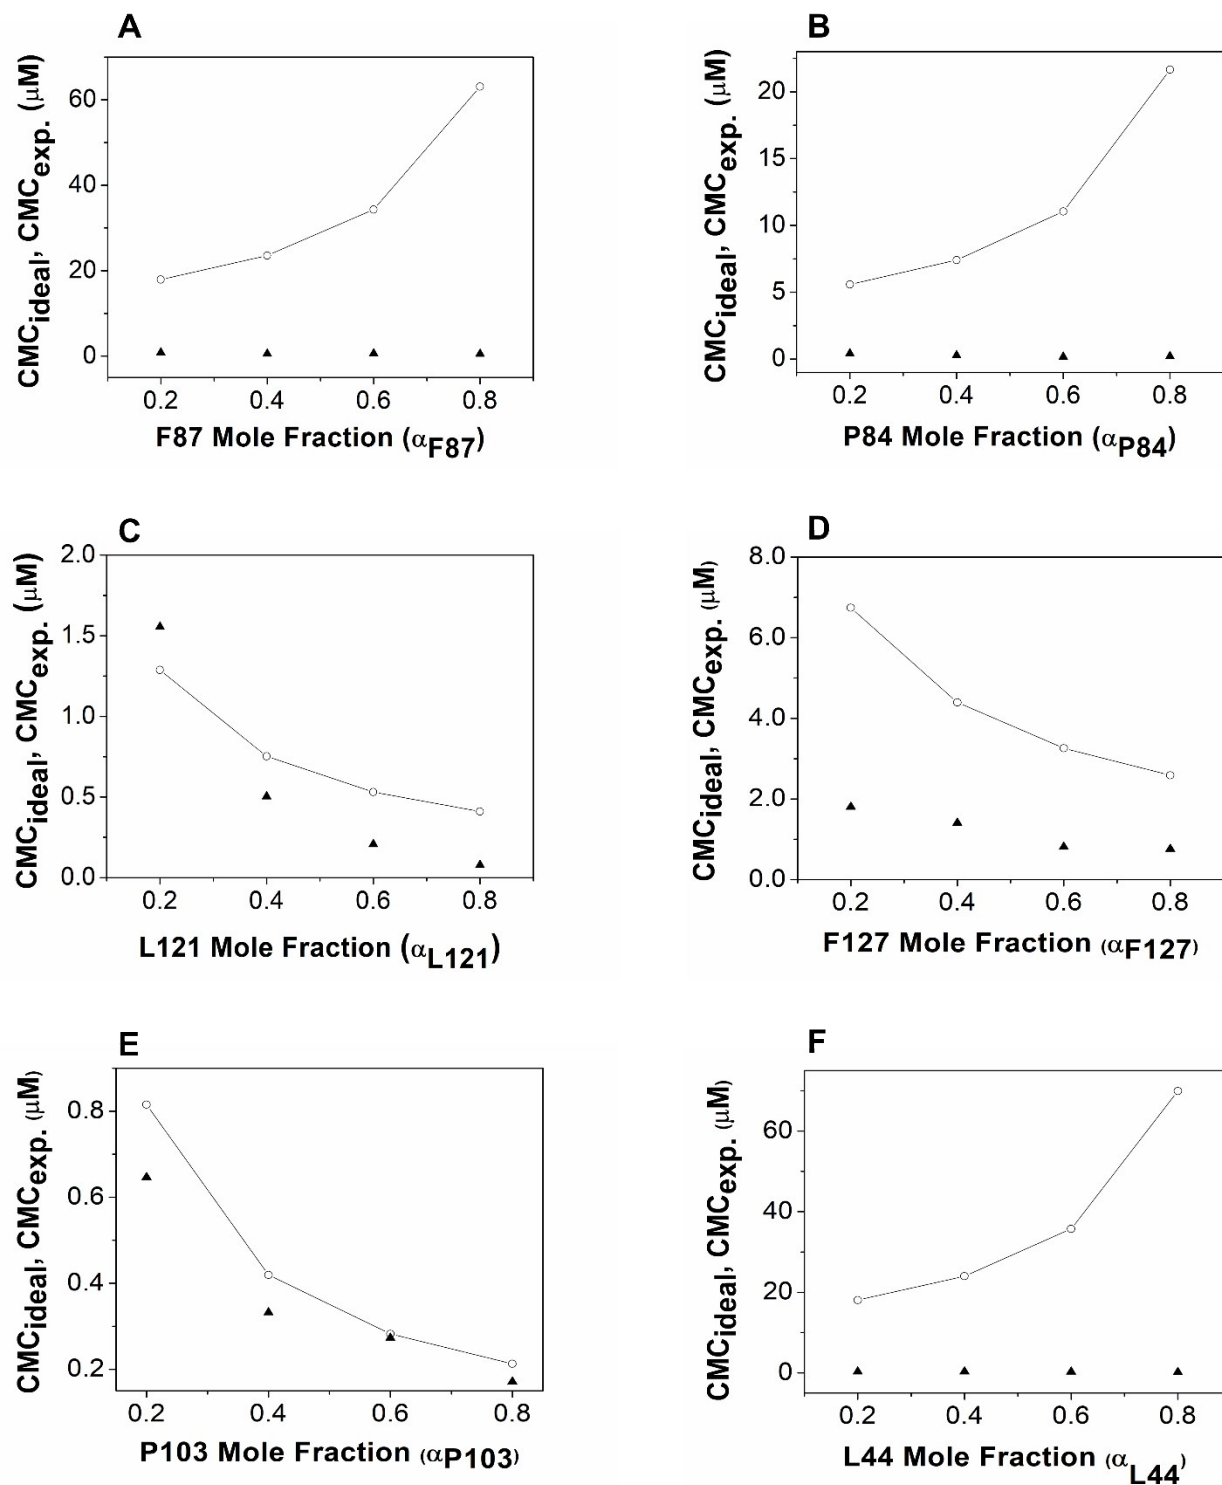

**Figure S6** Calculated ideal CMC ( $\circ$ ) and experimentally determined CMC values ( $\blacktriangle$ ) for each Pluronic/16-3-16/pDNA mixtures at varying Pluronic mole fractions. A) shows F87 mixtures, B) P84, C) L121, D) F127, E) P103, F) L44.

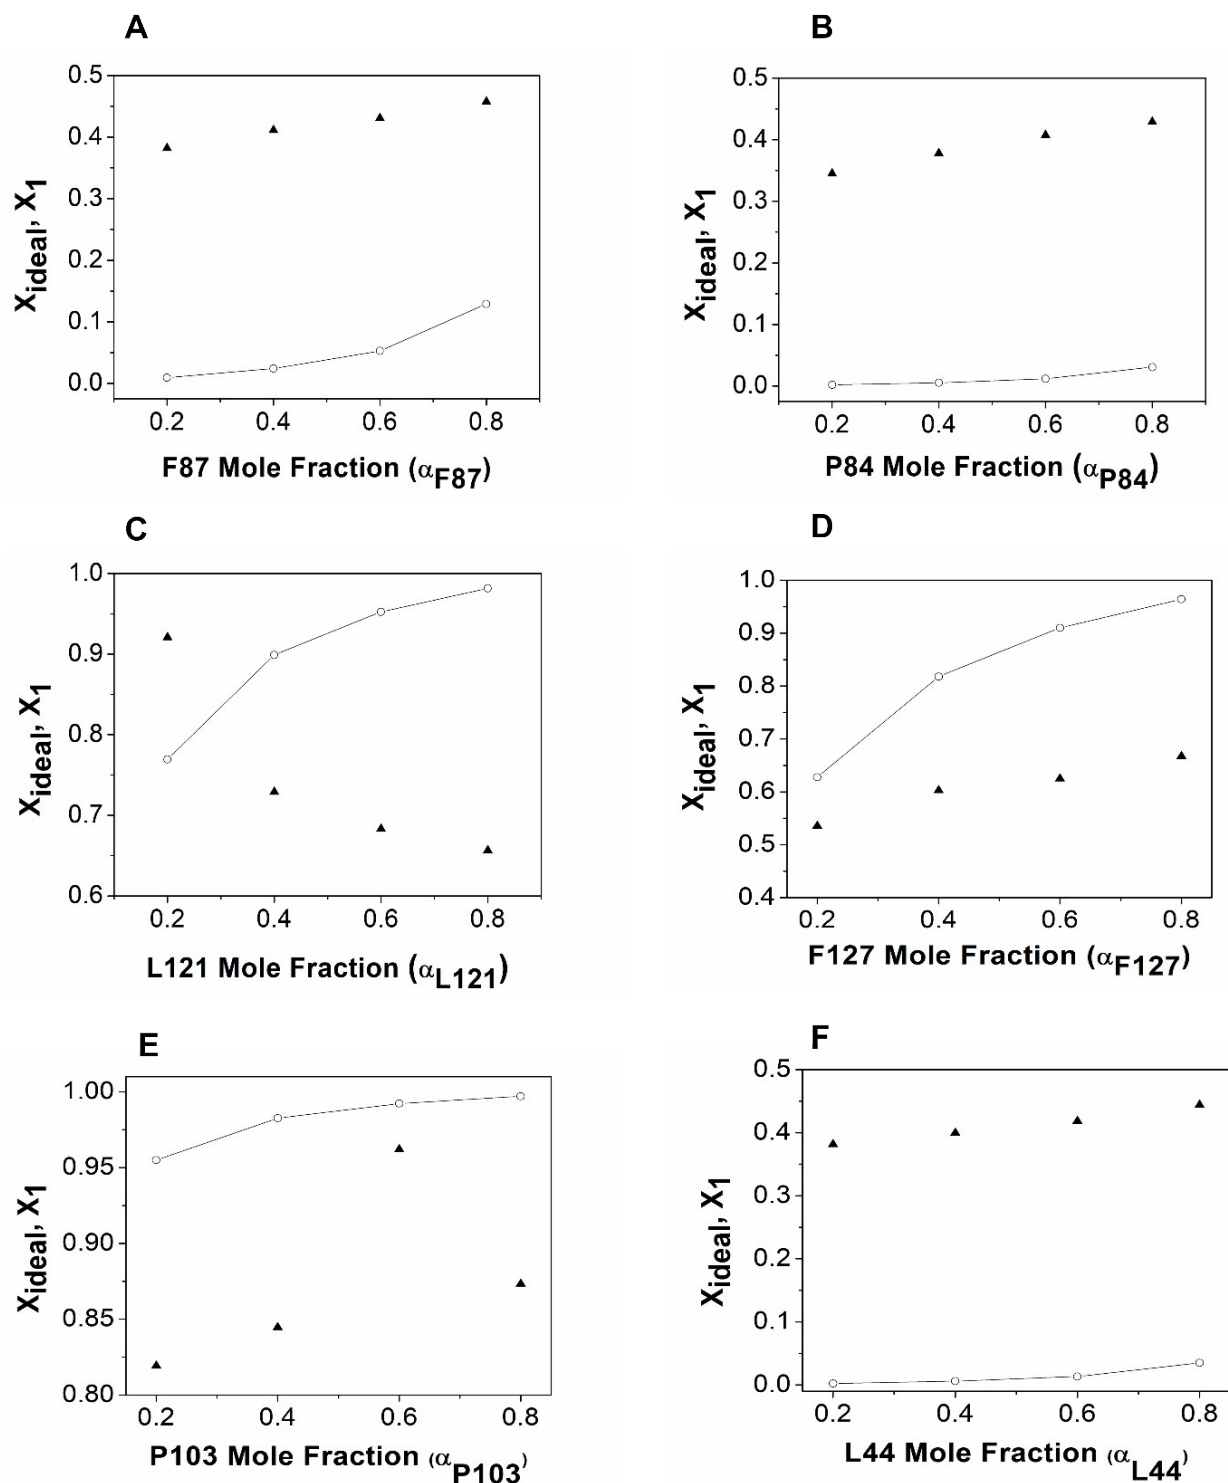

**Figure S7** Calculated  $X_{ideal}$  ( $\circ$ ) and  $X_1$  values ( $\blacktriangle$ ) for Pluronic/16-3-16/pDNA mixtures at varying Pluronic mole fractions. A) shows F87 mixtures, B) P84, C) L121, D) F127, E) P103, F) L44.

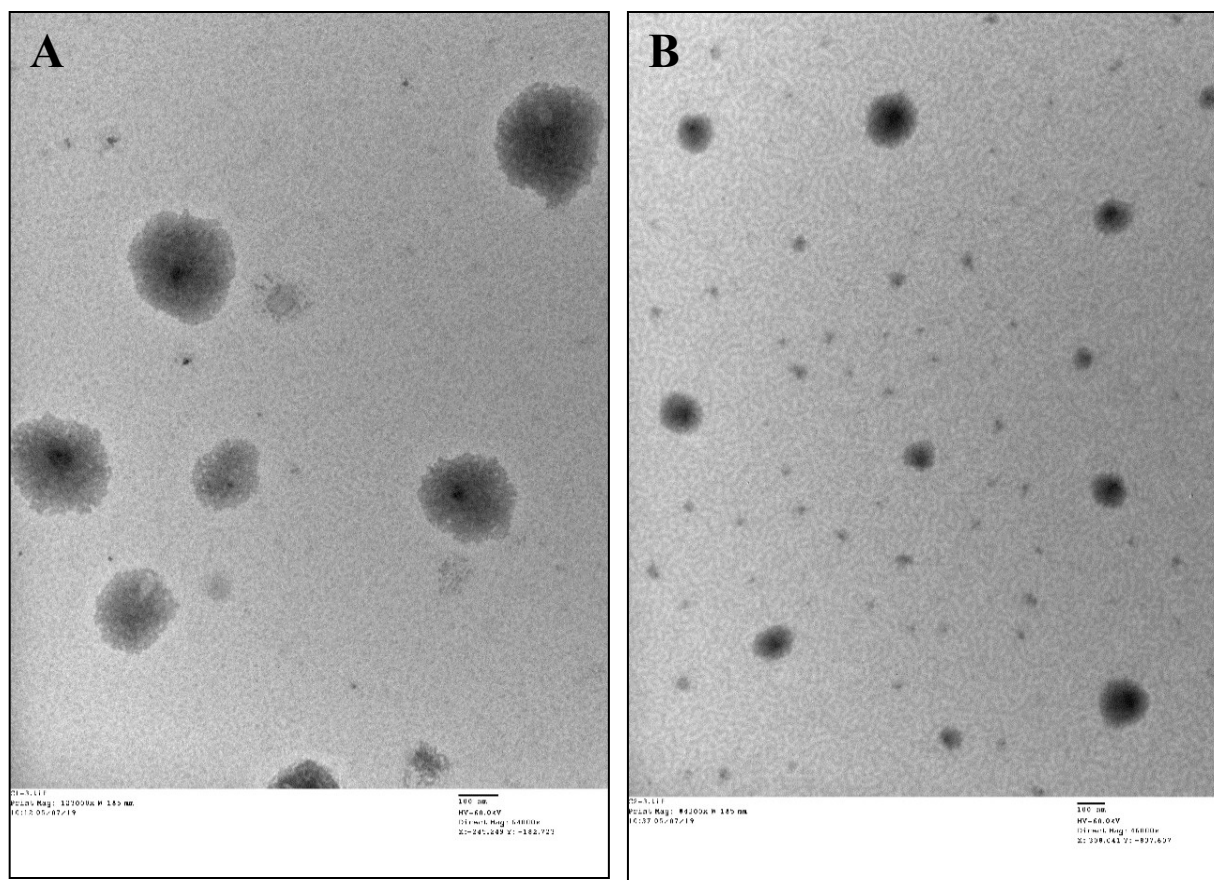

**Figure S8** Transmission electron micrographs of A) 16-3-16/pDNA 10:1 complex (without Pluronic) at 64000x magnification, B) 0.2 P84 at 46000x. All size bars represent 100nm.
